# Supplementary material
Source: ML conference proceedings conference paper supplement (https://aclanthology.org/D19-1449)
Supplement: Attachment [file D19-1449.Attachment.zip]

## A Supplemental Material

We report main BLI results for all  $15 \times 14 = 210$  language pairs in the supplemental material, grouped by the source language, and for two dictionary sizes:  $|D_0| = 1,000$  and  $|D_0| = 500$ . The results are provided in Table 6–Table 20. As stressed in the table captions, for the descriptions of benchmarked CLWE configurations, we refer the reader to the main paper: in particular to §2 and Table 1.

(The actual tables start on the next page.)

| Bulgarian: BG-  |      |      |      |      |      |      |      |      |      |      |      |      |      |      |
|-----------------|------|------|------|------|------|------|------|------|------|------|------|------|------|------|
|                 | -CA  | -EO  | -ET  | -EU  | -FI  | -HE  | -HU  | -ID  | -KA  | -KO  | -LT  | -NO  | -TH  | -TR  |
| UNSUPERVISED    | .353 | .147 | .262 | .005 | .096 | .262 | .386 | .270 | .259 | .004 | .247 | .368 | .001 | .254 |
| 5K:ORTHG-SUPER  | .350 | .182 | .315 | .173 | .292 | .251 | .379 | .242 | .261 | .125 | .358 | .300 | .089 | .297 |
| 5K:ORTHG+SL+SYM | .380 | .215 | .327 | .179 | .319 | .277 | .402 | .271 | .286 | .142 | .372 | .341 | .105 | .321 |
| 5K:FULL-SUPER   | .432 | .327 | .407 | .250 | .357 | .361 | .460 | .283 | .364 | .205 | .445 | .398 | .169 | .349 |
| 5K:FULL+SL      | .383 | .273 | .297 | .198 | .203 | .279 | .394 | .277 | .268 | .136 | .301 | .388 | .102 | .291 |
| 5K:FULL+SL+NOD  | .427 | .357 | .350 | .245 | .272 | .317 | .439 | .305 | .292 | .179 | .339 | .422 | .154 | .326 |
| 5K:FULL+SL+SYM  | .456 | .370 | .405 | .296 | .374 | .368 | .475 | .325 | .367 | .215 | .407 | .446 | .179 | .374 |
| 1K:ORTHG-SUPER  | .166 | .060 | .141 | .046 | .108 | .076 | .178 | .111 | .098 | .038 | .183 | .122 | .023 | .111 |
| 1K:ORTHG+SL+SYM | .310 | .135 | .270 | .087 | .230 | .180 | .346 | .191 | .200 | .071 | .312 | .258 | .030 | .226 |
| 1K:FULL-SUPER   | .229 | .147 | .211 | .070 | .129 | .112 | .254 | .116 | .157 | .054 | .230 | .163 | .044 | .133 |
| 1K:FULL+SL      | .381 | .275 | .291 | .198 | .211 | .280 | .392 | .270 | .275 | .127 | .303 | .365 | .101 | .285 |
| 1K:FULL+SL+NOD  | .426 | .335 | .347 | .241 | .272 | .315 | .437 | .308 | .306 | .168 | .331 | .413 | .143 | .324 |
| 1K:FULL+SL+SYM  | .444 | .357 | .388 | .279 | .361 | .345 | .467 | .314 | .333 | .186 | .369 | .441 | .128 | .357 |

Table 6: All BLI scores (MRR) with Bulgarian (BG) as the source language.  $5k$  and  $1k$  denote the seed dictionary  $D_0$  size for (weakly) supervised methods. See Table 1 for a brief description of each model configuration.

| Catalan: CA-    |      |      |      |      |      |      |      |      |      |      |      |      |      |      |
|-----------------|------|------|------|------|------|------|------|------|------|------|------|------|------|------|
|                 | -BG  | -EO  | -ET  | -EU  | -FI  | -HE  | -HU  | -ID  | -KA  | -KO  | -LT  | -NO  | -TH  | -TR  |
| UNSUPERVISED    | .330 | .310 | .198 | .258 | .228 | .239 | .334 | .302 | .177 | .002 | .163 | .347 | .000 | .260 |
| 5K:ORTHG-SUPER  | .315 | .199 | .244 | .219 | .252 | .227 | .360 | .249 | .199 | .130 | .258 | .294 | .093 | .283 |
| 5K:ORTHG+SL+SYM | .331 | .239 | .269 | .244 | .288 | .258 | .390 | .280 | .213 | .149 | .282 | .340 | .108 | .301 |
| 5K:FULL-SUPER   | .396 | .395 | .356 | .338 | .329 | .336 | .431 | .286 | .309 | .217 | .366 | .396 | .196 | .337 |
| 5K:FULL+SL      | .331 | .357 | .223 | .289 | .214 | .257 | .368 | .299 | .174 | .128 | .215 | .366 | .171 | .275 |
| 5K:FULL+SL+NOD  | .372 | .458 | .276 | .347 | .265 | .290 | .411 | .317 | .224 | .180 | .264 | .416 | .223 | .308 |
| 5K:FULL+SL+SYM  | .414 | .456 | .352 | .391 | .356 | .357 | .449 | .322 | .302 | .245 | .343 | .433 | .218 | .348 |
| 1K:ORTHG-SUPER  | .160 | .075 | .089 | .063 | .098 | .064 | .151 | .117 | .052 | .029 | .098 | .101 | .018 | .116 |
| 1K:ORTHG+SL+SYM | .274 | .151 | .174 | .126 | .168 | .143 | .298 | .207 | .096 | .047 | .198 | .235 | .025 | .193 |
| 1K:FULL-SUPER   | .212 | .167 | .165 | .116 | .110 | .103 | .210 | .126 | .101 | .046 | .144 | .138 | .035 | .133 |
| 1K:FULL+SL      | .329 | .361 | .223 | .282 | .218 | .252 | .366 | .299 | .166 | .129 | .225 | .358 | .162 | .272 |
| 1K:FULL+SL+NOD  | .372 | .457 | .274 | .342 | .263 | .289 | .411 | .316 | .213 | .170 | .256 | .416 | .217 | .308 |
| 1K:FULL+SL+SYM  | .395 | .446 | .300 | .370 | .319 | .335 | .435 | .320 | .253 | .202 | .295 | .424 | .142 | .334 |

Table 7: All BLI scores (MRR) with Catalan (CA) as the source language.  $5k$  and  $1k$  denote the seed dictionary  $D_0$  size for (weakly) supervised methods. See Table 1 for a brief description of each model configuration.

| Esperanto: EO-  |      |      |      |      |      |      |      |      |      |      |      |      |      |      |
|-----------------|------|------|------|------|------|------|------|------|------|------|------|------|------|------|
|                 | -BG  | -CA  | -ET  | -EU  | -FI  | -HE  | -HU  | -ID  | -KA  | -KO  | -LT  | -NO  | -TH  | -TR  |
| UNSUPERVISED    | .164 | .430 | .092 | .147 | .012 | .157 | .040 | .047 | .177 | .000 | .198 | .322 | .000 | .001 |
| 5K:ORTHG-SUPER  | .247 | .367 | .209 | .169 | .246 | .138 | .319 | .171 | .165 | .082 | .221 | .225 | .046 | .210 |
| 5K:ORTHG+SL+SYM | .268 | .401 | .227 | .182 | .264 | .160 | .343 | .189 | .179 | .087 | .246 | .254 | .051 | .220 |
| 5K:FULL-SUPER   | .367 | .491 | .334 | .294 | .329 | .258 | .400 | .267 | .281 | .171 | .343 | .337 | .107 | .285 |
| 5K:FULL+SL      | .281 | .486 | .225 | .232 | .237 | .187 | .360 | .270 | .171 | .065 | .215 | .340 | .068 | .220 |
| 5K:FULL+SL+NOD  | .367 | .524 | .284 | .273 | .322 | .223 | .409 | .321 | .210 | .161 | .292 | .385 | .103 | .262 |
| 5K:FULL+SL+SYM  | .410 | .533 | .342 | .354 | .363 | .288 | .426 | .315 | .296 | .184 | .384 | .390 | .117 | .299 |
| 1K:ORTHG-SUPER  | .103 | .161 | .064 | .043 | .065 | .022 | .107 | .072 | .038 | .015 | .075 | .061 | .007 | .074 |
| 1K:ORTHG+SL+SYM | .163 | .266 | .112 | .074 | .105 | .050 | .186 | .104 | .064 | .021 | .127 | .108 | .008 | .103 |
| 1K:FULL-SUPER   | .152 | .221 | .136 | .083 | .080 | .044 | .145 | .099 | .078 | .024 | .120 | .083 | .017 | .087 |
| 1K:FULL+SL      | .289 | .491 | .216 | .250 | .229 | .158 | .357 | .262 | .167 | .065 | .215 | .344 | .066 | .223 |
| 1K:FULL+SL+NOD  | .371 | .511 | .272 | .264 | .304 | .194 | .407 | .313 | .205 | .142 | .274 | .383 | .080 | .257 |
| 1K:FULL+SL+SYM  | .385 | .521 | .314 | .315 | .328 | .241 | .411 | .298 | .255 | .111 | .358 | .376 | .056 | .259 |

Table 8: All BLI scores (MRR) with Esperanto (EO) as the source language.  $5k$  and  $1k$  denote the seed dictionary  $D_0$  size for (weakly) supervised methods. See Table 1 for a brief description of each model configuration.

| Estonian: ET-   |      |      |      |      |      |      |      |      |      |      |      |      |      |      |
|-----------------|------|------|------|------|------|------|------|------|------|------|------|------|------|------|
|                 | -BG  | -CA  | -EO  | -EU  | -FI  | -HE  | -HU  | -ID  | -KA  | -KO  | -LT  | -NO  | -TH  | -TR  |
| UNSUPERVISED    | .283 | .220 | .105 | .004 | .370 | .208 | .377 | .000 | .002 | .001 | .282 | .316 | .000 | .002 |
| 5K:ORTHG-SUPER  | .295 | .212 | .142 | .171 | .368 | .192 | .342 | .120 | .185 | .112 | .277 | .210 | .076 | .241 |
| 5K:ORTHG+SL+SYM | .301 | .234 | .160 | .172 | .388 | .209 | .365 | .136 | .192 | .121 | .286 | .246 | .089 | .255 |
| 5K:FULL-SUPER   | .393 | .333 | .271 | .238 | .430 | .287 | .432 | .212 | .258 | .191 | .360 | .328 | .168 | .307 |
| 5K:FULL+SL      | .309 | .258 | .217 | .128 | .393 | .221 | .382 | .160 | .183 | .114 | .286 | .320 | .090 | .249 |
| 5K:FULL+SL+NOD  | .354 | .308 | .268 | .181 | .397 | .268 | .418 | .210 | .208 | .152 | .319 | .351 | .150 | .277 |
| 5K:FULL+SL+SYM  | .404 | .357 | .307 | .238 | .443 | .301 | .459 | .223 | .251 | .185 | .358 | .383 | .178 | .331 |
| 1K:ORTHG-SUPER  | .135 | .080 | .060 | .074 | .171 | .050 | .145 | .034 | .067 | .033 | .131 | .069 | .025 | .073 |
| 1K:ORTHG+SL+SYM | .238 | .153 | .096 | .108 | .347 | .124 | .307 | .075 | .121 | .060 | .228 | .158 | .033 | .152 |
| 1K:FULL-SUPER   | .200 | .121 | .116 | .099 | .200 | .069 | .188 | .065 | .095 | .052 | .179 | .112 | .041 | .102 |
| 1K:FULL+SL      | .289 | .240 | .221 | .127 | .395 | .211 | .380 | .163 | .183 | .117 | .286 | .315 | .074 | .248 |
| 1K:FULL+SL+NOD  | .343 | .294 | .267 | .193 | .396 | .259 | .420 | .209 | .204 | .147 | .316 | .352 | .123 | .290 |
| 1K:FULL+SL+SYM  | .381 | .346 | .297 | .208 | .437 | .277 | .449 | .204 | .215 | .148 | .337 | .377 | .108 | .313 |

Table 9: All BLI scores (MRR) with Estonian (ET) as the source language. 5k and 1k denote the seed dictionary  $D_0$  size for (weakly) supervised methods. See Table 1 for a brief description of each model configuration.

| Basque: EU-     |      |      |      |      |      |      |      |      |      |      |      |      |      |      |
|-----------------|------|------|------|------|------|------|------|------|------|------|------|------|------|------|
|                 | -BG  | -CA  | -EO  | -ET  | -FI  | -HE  | -HU  | -ID  | -KA  | -KO  | -LT  | -NO  | -TH  | -TR  |
| UNSUPERVISED    | .002 | .254 | .115 | .007 | .008 | .048 | .001 | .001 | .059 | .000 | .001 | .000 | .000 | .000 |
| 5K:ORTHG-SUPER  | .190 | .279 | .122 | .174 | .155 | .134 | .178 | .134 | .154 | .069 | .159 | .138 | .045 | .176 |
| 5K:ORTHG+SL+SYM | .196 | .307 | .135 | .181 | .175 | .148 | .193 | .147 | .165 | .076 | .175 | .155 | .049 | .187 |
| 5K:FULL-SUPER   | .292 | .391 | .245 | .250 | .233 | .211 | .259 | .183 | .197 | .109 | .242 | .240 | .095 | .240 |
| 5K:FULL+SL      | .203 | .371 | .203 | .126 | .175 | .110 | .187 | .209 | .084 | .043 | .098 | .201 | .069 | .170 |
| 5K:FULL+SL+NOD  | .248 | .423 | .243 | .181 | .219 | .163 | .228 | .244 | .121 | .081 | .148 | .252 | .093 | .208 |
| 5K:FULL+SL+SYM  | .310 | .441 | .277 | .248 | .270 | .206 | .283 | .225 | .189 | .106 | .237 | .287 | .094 | .248 |
| 1K:ORTHG-SUPER  | .090 | .117 | .038 | .061 | .045 | .029 | .054 | .044 | .051 | .019 | .052 | .037 | .012 | .044 |
| 1K:ORTHG+SL+SYM | .116 | .192 | .061 | .105 | .072 | .052 | .102 | .062 | .080 | .029 | .086 | .066 | .013 | .077 |
| 1K:FULL-SUPER   | .120 | .142 | .077 | .088 | .048 | .037 | .077 | .049 | .059 | .021 | .071 | .053 | .018 | .055 |
| 1K:FULL+SL      | .206 | .348 | .207 | .117 | .172 | .115 | .186 | .209 | .080 | .039 | .101 | .201 | .072 | .159 |
| 1K:FULL+SL+NOD  | .244 | .418 | .230 | .179 | .214 | .163 | .225 | .236 | .111 | .073 | .136 | .248 | .077 | .202 |
| 1K:FULL+SL+SYM  | .276 | .428 | .253 | .213 | .247 | .166 | .266 | .213 | .147 | .060 | .169 | .261 | .056 | .212 |

Table 10: All BLI scores (MRR) with Basque (EU) as the source language. 5k and 1k denote the seed dictionary  $D_0$  size for (weakly) supervised methods. See Table 1 for a brief description of each model configuration.

| Finnish: FI-    |      |      |      |      |      |      |      |      |      |      |      |      |      |      |
|-----------------|------|------|------|------|------|------|------|------|------|------|------|------|------|------|
|                 | -BG  | -CA  | -EO  | -ET  | -EU  | -HE  | -HU  | -ID  | -KA  | -KO  | -LT  | -NO  | -TH  | -TR  |
| UNSUPERVISED    | .120 | .304 | .013 | .361 | .004 | .243 | .411 | .230 | .003 | .000 | .284 | .395 | .000 | .162 |
| 5K:ORTHG-SUPER  | .292 | .295 | .132 | .302 | .116 | .216 | .407 | .221 | .166 | .132 | .265 | .332 | .082 | .300 |
| 5K:ORTHG+SL+SYM | .311 | .326 | .147 | .336 | .130 | .245 | .428 | .243 | .185 | .150 | .292 | .370 | .089 | .325 |
| 5K:FULL-SUPER   | .379 | .377 | .284 | .409 | .220 | .323 | .456 | .263 | .275 | .222 | .390 | .419 | .171 | .346 |
| 5K:FULL+SL      | .269 | .325 | .216 | .360 | .153 | .245 | .408 | .260 | .189 | .136 | .280 | .404 | .093 | .303 |
| 5K:FULL+SL+NOD  | .353 | .388 | .299 | .401 | .205 | .311 | .453 | .296 | .251 | .196 | .372 | .449 | .165 | .335 |
| 5K:FULL+SL+SYM  | .397 | .404 | .320 | .424 | .271 | .351 | .474 | .298 | .289 | .243 | .405 | .460 | .168 | .365 |
| 1K:ORTHG-SUPER  | .134 | .114 | .033 | .105 | .030 | .060 | .195 | .091 | .047 | .035 | .113 | .140 | .014 | .128 |
| 1K:ORTHG+SL+SYM | .246 | .198 | .049 | .275 | .047 | .129 | .368 | .141 | .086 | .059 | .228 | .285 | .017 | .230 |
| 1K:FULL-SUPER   | .174 | .142 | .077 | .167 | .054 | .071 | .226 | .098 | .084 | .052 | .158 | .161 | .028 | .149 |
| 1K:FULL+SL      | .258 | .276 | .222 | .361 | .154 | .253 | .400 | .255 | .199 | .129 | .309 | .402 | .065 | .309 |
| 1K:FULL+SL+NOD  | .351 | .330 | .298 | .400 | .193 | .309 | .452 | .299 | .246 | .183 | .372 | .448 | .141 | .334 |
| 1K:FULL+SL+SYM  | .381 | .396 | .304 | .416 | .235 | .331 | .463 | .300 | .270 | .211 | .389 | .455 | .107 | .353 |

Table 11: All BLI scores (MRR) with Finnish (FI) as the source language. 5k and 1k denote the seed dictionary  $D_0$  size for (weakly) supervised methods. See Table 1 for a brief description of each model configuration.

| Hebrew: HE-     |      |      |      |      |      |      |      |      |      |      |      |      |      |      |
|-----------------|------|------|------|------|------|------|------|------|------|------|------|------|------|------|
|                 | -BG  | -CA  | -EO  | -ET  | -EU  | -FI  | -HU  | -ID  | -KA  | -KO  | -LT  | -NO  | -TH  | -TR  |
| UNSUPERVISED    | .297 | .319 | .172 | .180 | .101 | .214 | .318 | .212 | .123 | .004 | .106 | .292 | .000 | .262 |
| 5K:ORTHG-SUPER  | .288 | .269 | .135 | .193 | .160 | .250 | .287 | .154 | .161 | .126 | .214 | .205 | .086 | .247 |
| 5K:ORTHG+SL+SYM | .307 | .298 | .149 | .206 | .161 | .279 | .315 | .181 | .167 | .135 | .229 | .238 | .107 | .274 |
| 5K:FULL-SUPER   | .397 | .376 | .248 | .288 | .225 | .329 | .375 | .239 | .213 | .204 | .309 | .316 | .173 | .328 |
| 5K:FULL+SL      | .304 | .316 | .193 | .187 | .137 | .223 | .314 | .212 | .142 | .142 | .193 | .284 | .124 | .267 |
| 5K:FULL+SL+NOD  | .343 | .356 | .241 | .230 | .171 | .269 | .361 | .250 | .179 | .185 | .237 | .323 | .190 | .298 |
| 5K:FULL+SL+SYM  | .378 | .384 | .278 | .278 | .211 | .320 | .393 | .266 | .217 | .218 | .301 | .349 | .192 | .337 |
| 1K:ORTHG-SUPER  | .126 | .101 | .040 | .064 | .050 | .068 | .096 | .057 | .048 | .033 | .078 | .058 | .022 | .086 |
| 1K:ORTHG+SL+SYM | .243 | .204 | .079 | .134 | .097 | .144 | .199 | .116 | .098 | .061 | .154 | .130 | .031 | .170 |
| 1K:FULL-SUPER   | .180 | .148 | .087 | .106 | .065 | .077 | .135 | .076 | .067 | .054 | .105 | .086 | .042 | .111 |
| 1K:FULL+SL      | .309 | .317 | .195 | .191 | .141 | .226 | .319 | .209 | .138 | .140 | .189 | .288 | .105 | .271 |
| 1K:FULL+SL+NOD  | .345 | .353 | .235 | .226 | .162 | .268 | .360 | .250 | .176 | .183 | .232 | .317 | .159 | .304 |
| 1K:FULL+SL+SYM  | .360 | .371 | .252 | .250 | .182 | .293 | .383 | .251 | .188 | .187 | .254 | .343 | .114 | .321 |

Table 12: All BLI scores (MRR) with Hebrew (HE) as the source language.  $5k$  and  $1k$  denote the seed dictionary  $D_0$  size for (weakly) supervised methods. See Table 1 for a brief description of each model configuration.

| Hungarian: HU-  |      |      |      |      |      |      |      |      |      |      |      |      |      |      |
|-----------------|------|------|------|------|------|------|------|------|------|------|------|------|------|------|
|                 | -BG  | -CA  | -EO  | -ET  | -EU  | -FI  | -HE  | -ID  | -KA  | -KO  | -LT  | -NO  | -TH  | -TR  |
| UNSUPERVISED    | .328 | .362 | .012 | .298 | .001 | .342 | .275 | .318 | .027 | .000 | .232 | .359 | .000 | .330 |
| 5K:ORTHG-SUPER  | .336 | .360 | .198 | .309 | .191 | .339 | .227 | .254 | .218 | .158 | .294 | .310 | .096 | .331 |
| 5K:ORTHG+SL+SYM | .357 | .391 | .222 | .341 | .204 | .372 | .262 | .277 | .237 | .184 | .326 | .345 | .105 | .348 |
| 5K:FULL-SUPER   | .431 | .443 | .344 | .423 | .282 | .397 | .349 | .338 | .326 | .259 | .411 | .406 | .173 | .372 |
| 5K:FULL+SL      | .348 | .402 | .302 | .325 | .205 | .343 | .275 | .318 | .218 | .187 | .246 | .361 | .087 | .338 |
| 5K:FULL+SL+NOD  | .397 | .445 | .378 | .370 | .252 | .372 | .319 | .364 | .265 | .228 | .319 | .402 | .145 | .361 |
| 5K:FULL+SL+SYM  | .438 | .477 | .392 | .433 | .305 | .407 | .376 | .374 | .332 | .285 | .419 | .441 | .176 | .380 |
| 1K:ORTHG-SUPER  | .164 | .170 | .063 | .125 | .056 | .149 | .068 | .113 | .063 | .039 | .128 | .102 | .008 | .161 |
| 1K:ORTHG+SL+SYM | .297 | .298 | .107 | .255 | .091 | .293 | .152 | .200 | .129 | .076 | .237 | .243 | .016 | .287 |
| 1K:FULL-SUPER   | .241 | .221 | .125 | .196 | .094 | .168 | .098 | .147 | .112 | .063 | .183 | .149 | .026 | .184 |
| 1K:FULL+SL      | .337 | .403 | .292 | .312 | .217 | .341 | .256 | .317 | .219 | .186 | .248 | .360 | .086 | .334 |
| 1K:FULL+SL+NOD  | .395 | .447 | .374 | .364 | .260 | .375 | .312 | .359 | .264 | .231 | .317 | .398 | .132 | .355 |
| 1K:FULL+SL+SYM  | .427 | .467 | .369 | .413 | .274 | .400 | .356 | .377 | .306 | .268 | .381 | .423 | .113 | .374 |

Table 13: All BLI scores (MRR) with Hungarian (HU) as the source language.  $5k$  and  $1k$  denote the seed dictionary  $D_0$  size for (weakly) supervised methods. See Table 1 for a brief description of each model configuration.

| Indonesian: ID- |      |      |      |      |      |      |      |      |      |      |      |      |      |      |
|-----------------|------|------|------|------|------|------|------|------|------|------|------|------|------|------|
|                 | -BG  | -CA  | -EO  | -ET  | -EU  | -FI  | -HE  | -HU  | -KA  | -KO  | -LT  | -NO  | -TH  | -TR  |
| UNSUPERVISED    | .132 | .271 | .005 | .000 | .001 | .174 | .190 | .256 | .001 | .001 | .000 | .257 | .001 | .252 |
| 5K:ORTHG-SUPER  | .223 | .256 | .153 | .217 | .111 | .182 | .222 | .273 | .162 | .126 | .201 | .233 | .147 | .276 |
| 5K:ORTHG+SL+SYM | .237 | .278 | .167 | .228 | .123 | .219 | .239 | .294 | .170 | .140 | .207 | .265 | .163 | .294 |
| 5K:FULL-SUPER   | .281 | .300 | .247 | .281 | .173 | .233 | .290 | .349 | .222 | .193 | .260 | .294 | .218 | .316 |
| 5K:FULL+SL      | .156 | .273 | .170 | .126 | .132 | .171 | .201 | .256 | .099 | .126 | .073 | .258 | .215 | .265 |
| 5K:FULL+SL+NOD  | .210 | .300 | .218 | .174 | .166 | .226 | .238 | .300 | .133 | .172 | .110 | .288 | .253 | .292 |
| 5K:FULL+SL+SYM  | .287 | .323 | .274 | .266 | .220 | .269 | .295 | .345 | .200 | .197 | .242 | .320 | .241 | .326 |
| 1K:ORTHG-SUPER  | .092 | .098 | .050 | .075 | .025 | .053 | .068 | .109 | .039 | .043 | .069 | .074 | .037 | .129 |
| 1K:ORTHG+SL+SYM | .150 | .168 | .078 | .142 | .037 | .082 | .140 | .197 | .071 | .078 | .108 | .142 | .052 | .225 |
| 1K:FULL-SUPER   | .121 | .114 | .092 | .115 | .038 | .053 | .093 | .129 | .063 | .062 | .086 | .081 | .052 | .152 |
| 1K:FULL+SL      | .149 | .267 | .170 | .132 | .134 | .171 | .198 | .257 | .101 | .123 | .073 | .257 | .217 | .266 |
| 1K:FULL+SL+NOD  | .208 | .301 | .213 | .167 | .165 | .218 | .240 | .299 | .126 | .165 | .101 | .287 | .246 | .290 |
| 1K:FULL+SL+SYM  | .258 | .316 | .254 | .213 | .187 | .250 | .264 | .337 | .140 | .175 | .152 | .309 | .226 | .319 |

Table 14: All BLI scores (MRR) with Indonesian (ID) as the source language.  $5k$  and  $1k$  denote the seed dictionary  $D_0$  size for (weakly) supervised methods. See Table 1 for a brief description of each model configuration.

| Georgian: KA-   |      |      |      |      |      |      |      |      |      |      |      |      |      |      |
|-----------------|------|------|------|------|------|------|------|------|------|------|------|------|------|------|
|                 | -BG  | -CA  | -EO  | -ET  | -EU  | -FI  | -HE  | -HU  | -ID  | -KO  | -LT  | -NO  | -TH  | -TR  |
| UNSUPERVISED    | .211 | .205 | .180 | .003 | .096 | .007 | .166 | .200 | .000 | .000 | .237 | .179 | .000 | .001 |
| 5K:ORTHG-SUPER  | .251 | .187 | .116 | .195 | .154 | .210 | .155 | .218 | .088 | .085 | .234 | .123 | .056 | .204 |
| 5K:ORTHG+SL+SYM | .262 | .205 | .130 | .206 | .165 | .233 | .167 | .245 | .095 | .092 | .255 | .138 | .061 | .221 |
| 5K:FULL-SUPER   | .372 | .297 | .243 | .282 | .217 | .292 | .245 | .308 | .169 | .154 | .327 | .214 | .127 | .257 |
| 5K:FULL+SL      | .310 | .233 | .182 | .225 | .133 | .252 | .172 | .258 | .130 | .069 | .248 | .188 | .069 | .203 |
| 5K:FULL+SL+NOD  | .337 | .285 | .226 | .257 | .165 | .288 | .216 | .290 | .160 | .117 | .292 | .217 | .114 | .242 |
| 5K:FULL+SL+SYM  | .376 | .320 | .265 | .293 | .216 | .318 | .251 | .326 | .172 | .143 | .340 | .253 | .139 | .275 |
| 1K:ORTHG-SUPER  | .093 | .051 | .036 | .069 | .040 | .049 | .026 | .069 | .024 | .023 | .101 | .026 | .013 | .076 |
| 1K:ORTHG+SL+SYM | .166 | .094 | .060 | .133 | .066 | .097 | .064 | .147 | .044 | .040 | .188 | .048 | .014 | .122 |
| 1K:FULL-SUPER   | .153 | .088 | .083 | .112 | .068 | .065 | .046 | .103 | .048 | .036 | .138 | .048 | .025 | .091 |
| 1K:FULL+SL      | .234 | .231 | .182 | .225 | .136 | .245 | .175 | .258 | .135 | .077 | .245 | .189 | .060 | .201 |
| 1K:FULL+SL+NOD  | .307 | .284 | .215 | .256 | .164 | .286 | .208 | .292 | .159 | .105 | .291 | .220 | .099 | .237 |
| 1K:FULL+SL+SYM  | .352 | .305 | .248 | .271 | .172 | .306 | .213 | .308 | .155 | .103 | .317 | .238 | .077 | .255 |

Table 15: All BLI scores (MRR) with Georgian (KA) as the source language.  $5k$  and  $1k$  denote the seed dictionary  $D_0$  size for (weakly) supervised methods. See Table 1 for a brief description of each model configuration.

| Korean: KO-     |      |      |      |      |      |      |      |      |      |      |      |      |      |      |
|-----------------|------|------|------|------|------|------|------|------|------|------|------|------|------|------|
|                 | -BG  | -CA  | -EO  | -ET  | -EU  | -FI  | -HE  | -HU  | -ID  | -KA  | -LT  | -NO  | -TH  | -TR  |
| UNSUPERVISED    | .010 | .001 | .000 | .001 | .001 | .000 | .002 | .000 | .001 | .000 | .000 | .001 | .000 | .000 |
| 5K:ORTHG-SUPER  | .190 | .183 | .083 | .145 | .102 | .206 | .166 | .238 | .142 | .112 | .156 | .150 | .076 | .213 |
| 5K:ORTHG+SL+SYM | .198 | .204 | .088 | .145 | .106 | .229 | .180 | .263 | .162 | .107 | .154 | .166 | .083 | .232 |
| 5K:FULL-SUPER   | .289 | .283 | .176 | .242 | .170 | .273 | .257 | .326 | .210 | .178 | .241 | .256 | .174 | .278 |
| 5K:FULL+SL      | .161 | .183 | .065 | .141 | .080 | .180 | .187 | .281 | .162 | .065 | .089 | .193 | .101 | .235 |
| 5K:FULL+SL+NOD  | .240 | .262 | .135 | .185 | .114 | .243 | .240 | .320 | .213 | .120 | .138 | .258 | .161 | .270 |
| 5K:FULL+SL+SYM  | .303 | .299 | .178 | .229 | .174 | .289 | .282 | .358 | .233 | .176 | .224 | .289 | .176 | .302 |
| 1K:ORTHG-SUPER  | .052 | .055 | .025 | .031 | .033 | .053 | .026 | .063 | .043 | .024 | .036 | .033 | .014 | .068 |
| 1K:ORTHG+SL+SYM | .081 | .071 | .029 | .055 | .039 | .084 | .048 | .122 | .073 | .040 | .055 | .050 | .017 | .112 |
| 1K:FULL-SUPER   | .093 | .078 | .045 | .059 | .045 | .066 | .048 | .096 | .060 | .039 | .053 | .047 | .038 | .085 |
| 1K:FULL+SL      | .135 | .187 | .058 | .133 | .073 | .174 | .180 | .278 | .166 | .064 | .098 | .189 | .107 | .233 |
| 1K:FULL+SL+NOD  | .227 | .255 | .115 | .179 | .112 | .231 | .223 | .315 | .209 | .111 | .129 | .246 | .134 | .266 |
| 1K:FULL+SL+SYM  | .245 | .253 | .110 | .191 | .108 | .266 | .232 | .343 | .206 | .122 | .150 | .244 | .089 | .279 |

Table 16: All BLI scores (MRR) with Korean (KO) as the source language.  $5k$  and  $1k$  denote the seed dictionary  $D_0$  size for (weakly) supervised methods. See Table 1 for a brief description of each model configuration.

| Lithuanian: LT- |      |      |      |      |      |      |      |      |      |      |      |      |      |      |
|-----------------|------|------|------|------|------|------|------|------|------|------|------|------|------|------|
|                 | -BG  | -CA  | -EO  | -ET  | -EU  | -FI  | -HE  | -HU  | -ID  | -KA  | -KO  | -NO  | -TH  | -TR  |
| UNSUPERVISED    | .336 | .194 | .259 | .308 | .001 | .296 | .153 | .286 | .000 | .232 | .000 | .264 | .000 | .181 |
| 5K:ORTHG-SUPER  | .328 | .224 | .145 | .274 | .165 | .258 | .182 | .288 | .099 | .193 | .093 | .185 | .066 | .220 |
| 5K:ORTHG+SL+SYM | .347 | .248 | .164 | .295 | .169 | .290 | .209 | .316 | .108 | .208 | .096 | .207 | .077 | .239 |
| 5K:FULL-SUPER   | .462 | .353 | .317 | .394 | .236 | .368 | .299 | .395 | .184 | .284 | .168 | .304 | .162 | .296 |
| 5K:FULL+SL      | .340 | .246 | .264 | .311 | .122 | .273 | .225 | .296 | .136 | .237 | .071 | .258 | .068 | .192 |
| 5K:FULL+SL+NOD  | .381 | .323 | .323 | .353 | .161 | .361 | .280 | .361 | .171 | .277 | .115 | .304 | .146 | .245 |
| 5K:FULL+SL+SYM  | .437 | .363 | .348 | .383 | .222 | .385 | .316 | .413 | .191 | .304 | .160 | .336 | .168 | .319 |
| 1K:ORTHG-SUPER  | .160 | .080 | .035 | .110 | .047 | .103 | .040 | .115 | .031 | .065 | .021 | .050 | .018 | .069 |
| 1K:ORTHG+SL+SYM | .294 | .171 | .072 | .236 | .075 | .224 | .103 | .216 | .064 | .136 | .038 | .109 | .023 | .135 |
| 1K:FULL-SUPER   | .256 | .138 | .102 | .190 | .085 | .143 | .073 | .159 | .058 | .097 | .040 | .081 | .030 | .097 |
| 1K:FULL+SL      | .342 | .250 | .264 | .312 | .124 | .314 | .228 | .294 | .133 | .240 | .065 | .263 | .052 | .197 |
| 1K:FULL+SL+NOD  | .384 | .319 | .325 | .353 | .154 | .363 | .280 | .358 | .168 | .277 | .107 | .305 | .126 | .245 |
| 1K:FULL+SL+SYM  | .408 | .345 | .332 | .361 | .181 | .380 | .286 | .399 | .168 | .288 | .109 | .322 | .094 | .302 |

Table 17: All BLI scores (MRR) with Lithuanian (LT) as the source language.  $5k$  and  $1k$  denote the seed dictionary  $D_0$  size for (weakly) supervised methods. See Table 1 for a brief description of each model configuration.

| Norwegian: NO-  |      |      |      |      |      |      |      |      |      |      |      |      |      |      |
|-----------------|------|------|------|------|------|------|------|------|------|------|------|------|------|------|
|                 | -BG  | -CA  | -EO  | -ET  | -EU  | -FI  | -HE  | -HU  | -ID  | -KA  | -KO  | -LT  | -TH  | -TR  |
| UNSUPERVISED    | .326 | .380 | .302 | .296 | .001 | .348 | .256 | .388 | .319 | .207 | .000 | .234 | .000 | .291 |
| 5K:ORTHG-SUPER  | .316 | .359 | .180 | .284 | .171 | .344 | .224 | .368 | .270 | .189 | .148 | .264 | .101 | .280 |
| 5K:ORTHG+SL+SYM | .334 | .390 | .207 | .310 | .189 | .378 | .247 | .401 | .300 | .213 | .168 | .277 | .111 | .301 |
| 5K:FULL-SUPER   | .394 | .424 | .323 | .389 | .261 | .396 | .319 | .441 | .306 | .291 | .220 | .366 | .188 | .325 |
| 5K:FULL+SL      | .329 | .390 | .309 | .303 | .200 | .355 | .258 | .389 | .315 | .196 | .141 | .240 | .127 | .292 |
| 5K:FULL+SL+NOD  | .374 | .439 | .381 | .345 | .253 | .387 | .292 | .426 | .341 | .235 | .193 | .281 | .182 | .319 |
| 5K:FULL+SL+SYM  | .422 | .457 | .377 | .395 | .328 | .419 | .353 | .452 | .340 | .298 | .250 | .351 | .197 | .341 |
| 1K:ORTHG-SUPER  | .166 | .162 | .069 | .120 | .041 | .153 | .065 | .166 | .121 | .054 | .040 | .110 | .021 | .104 |
| 1K:ORTHG+SL+SYM | .284 | .302 | .125 | .233 | .078 | .307 | .136 | .323 | .222 | .111 | .064 | .198 | .028 | .191 |
| 1K:FULL-SUPER   | .203 | .198 | .128 | .172 | .075 | .153 | .078 | .206 | .132 | .088 | .057 | .132 | .032 | .123 |
| 1K:FULL+SL      | .329 | .389 | .311 | .303 | .193 | .357 | .258 | .389 | .317 | .195 | .147 | .236 | .125 | .293 |
| 1K:FULL+SL+NOD  | .373 | .437 | .374 | .341 | .249 | .389 | .291 | .425 | .338 | .229 | .189 | .281 | .178 | .319 |
| 1K:FULL+SL+SYM  | .411 | .444 | .374 | .371 | .300 | .412 | .336 | .443 | .339 | .268 | .228 | .315 | .140 | .332 |

Table 18: All BLI scores (MRR) with Norwegian (NO) as the source language. 5k and 1k denote the seed dictionary  $D_0$  size for (weakly) supervised methods. See Table 1 for a brief description of each model configuration.

| Thai: TH-       |      |      |      |      |      |      |      |      |      |      |      |      |      |      |
|-----------------|------|------|------|------|------|------|------|------|------|------|------|------|------|------|
|                 | -BG  | -CA  | -EO  | -ET  | -EU  | -FI  | -HE  | -HU  | -ID  | -KA  | -KO  | -LT  | -NO  | -TR  |
| UNSUPERVISED    | .000 | .000 | .000 | .000 | .000 | .000 | .000 | .000 | .002 | .000 | .000 | .000 | .000 | .000 |
| 5K:ORTHG-SUPER  | .151 | .090 | .066 | .119 | .074 | .124 | .123 | .123 | .112 | .086 | .086 | .142 | .115 | .119 |
| 5K:ORTHG+SL+SYM | .148 | .096 | .063 | .127 | .073 | .134 | .147 | .139 | .123 | .093 | .090 | .152 | .121 | .130 |
| 5K:FULL-SUPER   | .210 | .134 | .087 | .186 | .094 | .173 | .173 | .178 | .141 | .116 | .112 | .214 | .162 | .177 |
| 5K:FULL+SL      | .051 | .058 | .017 | .071 | .035 | .041 | .122 | .051 | .119 | .018 | .036 | .044 | .050 | .071 |
| 5K:FULL+SL+NOD  | .101 | .098 | .041 | .129 | .062 | .123 | .186 | .097 | .167 | .061 | .069 | .140 | .093 | .120 |
| 5K:FULL+SL+SYM  | .174 | .123 | .073 | .164 | .093 | .167 | .203 | .160 | .170 | .126 | .097 | .215 | .147 | .160 |
| 1K:ORTHG-SUPER  | .042 | .021 | .018 | .046 | .022 | .030 | .037 | .035 | .045 | .028 | .031 | .057 | .027 | .041 |
| 1K:ORTHG+SL+SYM | .066 | .027 | .024 | .062 | .024 | .038 | .062 | .060 | .067 | .045 | .047 | .085 | .050 | .067 |
| 1K:FULL-SUPER   | .049 | .027 | .021 | .070 | .029 | .032 | .057 | .044 | .044 | .034 | .040 | .084 | .029 | .052 |
| 1K:FULL+SL      | .049 | .047 | .016 | .059 | .030 | .045 | .112 | .054 | .122 | .018 | .037 | .047 | .057 | .067 |
| 1K:FULL+SL+NOD  | .086 | .083 | .036 | .121 | .046 | .104 | .174 | .096 | .162 | .047 | .063 | .119 | .094 | .116 |
| 1K:FULL+SL+SYM  | .108 | .084 | .036 | .128 | .057 | .094 | .152 | .111 | .168 | .073 | .065 | .145 | .098 | .121 |

Table 19: All BLI scores (MRR) with Thai (TH) as the source language. 5k and 1k denote the seed dictionary  $D_0$  size for (weakly) supervised methods. See Table 1 for a brief description of each model configuration.

| Turkish: TR-    |      |      |      |      |      |      |      |      |      |      |      |      |      |      |
|-----------------|------|------|------|------|------|------|------|------|------|------|------|------|------|------|
|                 | -BG  | -CA  | -EO  | -ET  | -EU  | -FI  | -HE  | -HU  | -ID  | -KA  | -KO  | -LT  | -NO  | -TH  |
| UNSUPERVISED    | .214 | .276 | .000 | .001 | .001 | .192 | .208 | .332 | .307 | .000 | .000 | .073 | .260 | .000 |
| 5K:ORTHG-SUPER  | .265 | .288 | .112 | .212 | .164 | .247 | .214 | .328 | .267 | .131 | .126 | .209 | .226 | .103 |
| 5K:ORTHG+SL+SYM | .280 | .314 | .121 | .229 | .172 | .273 | .241 | .357 | .288 | .146 | .145 | .217 | .261 | .121 |
| 5K:FULL-SUPER   | .344 | .360 | .215 | .307 | .230 | .294 | .319 | .378 | .336 | .205 | .196 | .295 | .311 | .170 |
| 5K:FULL+SL      | .236 | .300 | .146 | .172 | .155 | .249 | .230 | .338 | .308 | .113 | .140 | .089 | .274 | .112 |
| 5K:FULL+SL+NOD  | .283 | .355 | .221 | .216 | .198 | .281 | .275 | .375 | .358 | .168 | .171 | .137 | .325 | .176 |
| 5K:FULL+SL+SYM  | .351 | .376 | .238 | .309 | .244 | .322 | .323 | .397 | .370 | .229 | .214 | .280 | .346 | .183 |
| 1K:ORTHG-SUPER  | .107 | .103 | .024 | .065 | .048 | .089 | .058 | .143 | .112 | .029 | .036 | .059 | .058 | .023 |
| 1K:ORTHG+SL+SYM | .198 | .184 | .039 | .130 | .076 | .160 | .122 | .303 | .203 | .055 | .063 | .112 | .121 | .040 |
| 1K:FULL-SUPER   | .150 | .133 | .052 | .112 | .062 | .093 | .076 | .167 | .131 | .053 | .050 | .099 | .073 | .028 |
| 1K:FULL+SL      | .230 | .309 | .156 | .167 | .147 | .250 | .223 | .336 | .312 | .108 | .139 | .093 | .273 | .113 |
| 1K:FULL+SL+NOD  | .280 | .354 | .213 | .218 | .183 | .281 | .269 | .371 | .352 | .160 | .167 | .138 | .323 | .166 |
| 1K:FULL+SL+SYM  | .327 | .364 | .204 | .274 | .209 | .310 | .301 | .398 | .363 | .201 | .194 | .215 | .344 | .137 |

Table 20: All BLI scores (MRR) with Turkish (TR) as the source language. 5k and 1k denote the seed dictionary  $D_0$  size for (weakly) supervised methods. See Table 1 for a brief description of each model configuration.
